# Supplementary material for: HS-SPME Analysis of True Lavender (Lavandula angustifolia Mill.) Leaves Treated by Various Drying Methods
Source: Molecules. 2019 Feb 20;24(4):764. doi: 10.3390/molecules24040764 (PMC6412978; doi:10.3390/molecules24040764)
Supplement: Supplementary file 1 [file molecules-24-00764-s001.zip › Tables.xlsx]

## Sheet: Table 1
			Constants
Drying conditions		A	K	n	R2	RMSE	τ	τ1	T		Mfwb (%)
									(°C)
CD 50°C		1	0.0201	0.953	0.9984	0.0125	245	-	50	7.18
CD 60°C		1	0.0125	1.173	0.9991	0.0104	145	-	60	7.09
CD 70°C		1	0.0202	1.15	0.9983	0.0156	135	-	70	7.42
VMD 240 W		1	0.0736	1.328	0.9989	0.0127	-	32	64	6.78
VMD 360 W		1	0.1205	1.358	0.9991	0.0104	-	21	65	6.9
VMD 480 W		1	0.2339	1.3	0.9991	0.0111	-	14	66	6.87
CPD 60°C+VMFD 480 W		0.449	0.2895	0.893	0.9982	0.0155	60	10	64	7.02

## Sheet: Table 2
Compound	RT (min)	Retention indeces (RI)			Content [%]4
		RI_lit1	RI_lit2	RI_exp3
1-Penten-3-ol	2.407	-	684	686	tr5
3-Hexenal. (Z)-	3.755	797	810	808	0.23±0.14
2-Hexenal. (E)-	4.765	846	854	857	0.33±0.17
3-Hexen-1-ol. (Z)-	4.821	850	857	859	1.75±0.35
1-Hexanol	5.087	863	868	871	0.32±0.09
2.4-Hexadienal. (E.E)-	6.113	909	911	913	0.15±0.09
5.5-Dimethyl-1-vinylbicyclo[2.1.1]hexane	6.380	-	921	924	tr
Tricyclene	6.479	921	926	928	0.17±0.03
α-Thujene	6.591	924	930	932	0.12±0.05
α-Pinene	6.788	932	939	940	0.30±0.07
Camphene	7.209	946	954	955	0.92±0.19
1.3.5-Cycloheptatriene. 3.7.7-trimethyl-	7.840	-	972	976	tr
Sabinene	7.911	696	976	978	0.11±0.03
1-Octen-3-ol	8.038	974	979	982	0.72±0.06
3-Octanone	8.260	979	986	988	0.22±0.03
β-Myrcene	8.415	988	991	993	0.52±0.22
Mesitylene	8.512	994	995	996	tr
n-Decane	8.681	1000	1000	1000	0.19±0.04
α-Phellandrene	8.850	1002	1005	1007	0.49±0.28
3-Carene	9.031	1008	1011	1013	1.60±0.66
p-Cymene	9.397	1020	1024	1026	2.58±0.33
o-Cymene	9.482	1022	1030	1028	4.81±0.52
Limonene	9.634	1024	1030	1033	3.42±1.16
Eucalyptol	9.692	1026	1031	1035	7.28±1.06
β-cis-Ocimene	9.902	1032	1038	1042	0.16±0.03
β-trans-Ocimene	10.240	1044	1050	1053	0.14±0.04
γ-Terpinene	10.605	1054	1059	1063	0.11±0.03
trans-Sabinene hydrate	10.886	1065	1070	1071	0.23±0.05
cis-Linalool oxide	11.041	1067	1074	1076	0.13±0.03
unknown	11.167	-	-	1079	tr
m-Cymenene	11.419	1082	1085	1086	0.50±0.04
p-Mentha-2.4(8)-diene	11.519	1085	1088	1089	0.34±0.10
p-Cymenene	11.602	1089	1091	1091	0.30±0.03
Camphenone	11.840	1095	1096	1097	0.26±0.02
Linalool	11.953	1095	1096	1100	0.42±0.03
1.3.8-p-Menthatriene	12.206	1108	1110	1108	0.10±0.02
1-Octen-3-ol acetate	12.360	1110	1112	1114	3.80±0.52
Menth-2-en-1-ol <cis-ρ->	12.556	1118	1121	1120	0.18±0.04
Mentha-2.8-dien-1-ol <trans-ρ->	12.724	1119	1122	1125	0.64±0.19
Mentha-2.8-dien-1-ol <cis-ρ->	13.173	1133	1137	1139	0.26±0.03
Menth-2-en-1-ol <trans-ρ->	13.327	1136	1140	1144	0.49±0.08
Camphor	13.496	1141	1146	1149	2.09±0.29
Lavandulol <tetrahydro->	13.960	1157	1161	1162	0.48±0.09
Borneol + Lavandulol	14.240	1165	1169	1170	4.66±0.69
Melilotal	14.450	1179	1182	1176	tr
Terpinen-4-ol	14.631	1174	1177	1181	0.59±0.07
m-Cymen-8-ol	14.774	1176	1179	1184	2.09±0.25
p-Cymen-8-ol	14.914	1179	1182	1188	4.09±0.67
α-Terpineol	15.082	1186	1189	1193	0.31±0.06
Myrtenol	15.278	1194	1195	1198	0.20±0.14
trans-Piperitol	15.671	1207	1208	1210	0.65±0.07
cis-Carveol	16.035	1215	1217	1222	0.37±0.07
Ocimenone. (Z)-	16.159	1226	1229	1226	0.26±0.07
Fenchyl acetate <exo->	16.356	1229	1232	1232	0.49±0.04
cis-Verbenol	16.623	1237	1244	1240	tr
Cumaldehyde	16.748	1238	1241	1244	1.92±0.59
Carvone	16.874	1246	1243	1247	1.08±0.28
Geraniol	17.055	1249	1252	1253	0.33±0.29
Linalyl acetate	17.263	1254	1257	1259	2.21±0.73
Geranial	17.529	1264	1267	1267	0.10±0.08
trans-Carvone oxide	18.021	1273	1276	1281	0.33±0.07
Bornyl acetate	18.301	1284	1285	1288	5.57±0.82
Lavandulyl acetate	18.428	1288	1290	1292	1.72±0.25
Terpinen-4-ol acetate	18.761	1299	1299	1301	0.18±0.02
unknown	19.124	-	-	1314	0.61±0.09
Myrtenyl acetate	19.435	1324	1326	1326	0.16±0.06
δ-Elemene	19.749	1335	1337	1337	tr
α-Terpinyl acetate	20.036	1346	1349	1347	0.26±0.08
α-Cubebene	20.179	1348	1351	1351	tr
α-Longipinene	20.351	1350	1352	1357	0.18±0.01
unknown	20.465	-	-	1361	0.31±0.05
Silphiperfola-4.7(14)-diene	20.578	1358	1362	1365	tr
Neryl acetate	20.748	1359	1364	1371	0.26±0.06
α-Copaene	21.134	1374	1376	1383	0.14±0.02
Geranyl acetate	21.248	1379	1381	1387	0.49±0.11
α-Bourbonene	21.375	1387	1388	1391	tr
α-Chamipinene	21.461	1394	1396	1394	tr
β-Longipinene	21.634	1400	1400	1399	0.26±0.06
Sesquithujene	21.833	1405	1405	1409	tr
α-Cedrene	22.049	1410	1411	1420	1.01±0.25
Caryophyllene. (E)-	22.176	1417	1419	1427	6.11±1.48
α-Bergamotene	22.506	1432	1435	1443	0.87±0.33
Cadina-3.5-diene	22.745	-	1458	1455	1.12±0.40
β-Famesene. (E)-	22.889	1454	1457	1462	1.35±0.38
cis-Muurola-4(15).5-diene	23.084	1465	1466	1472	1.44±0.45
4-epi-α-Acoradiene	23.155	1474	1475	1475	0.19±0.00
Germacrene D	23.441	1484	1481	1489	0.58±0.17
β-Himachalene	23.629	1500	1500	1498	tr
γ-Patchoulene	23.741	1502	-	1505	tr
α-Bulnesene	23.840	1509	1509	1511	0.92±0.16
γ-Cadinene	24.023	1513	1513	1523	10.53±1.51
cis-Calamenene	24.149	1528	1529	1531	0.65±0.07
Cubebol <10-epi->	24.290	1533	1535	1540	0.11±0.05
α-Cadinene	24.402	1537	1538	1547	0.12±0.02
Cadala-1(10).3.8-triene	24.473	-	1555	1552	tr
trans-Cadinene ether	24.669	1557	-	1564	0.35±0.09
unknown	24.851	-	-	1576	0.13±0.05
Spathulenol	24.950	1577	1578	1582	0.25±0.05
Caryophyllene oxide	25.158	1582	1583	1595	3.31±0.18
Cubenol <1-epi->	25.552	1627	1628	1628	0.56±0.03
τ-Cadinol	25.860	1635	1340	1656	2.04±0.55
unknown	26.056	-	-	1673	0.11±0.03
Caryophyllene <14-hydroxy-4.5-dihydro->	26.407	1706	1706	1706	0.21±0.11
Lanceol. (Z)-	26.911	1760	1761	1764	0.23±0.02

## Sheet: Table 3
Compound		Drying method
	Fresh	CD 50°C	CD 60°C	CD 70°C	CPD-VMFD	VMD 240 W	VMD 360 W	VMD 480 W
	Content [%]1
p-Cymene	2.58a	2.73c	2.72c	1.76d	2.01de	2.15e	2.27e	3.50b
o-Cymene	4.81a	6.26c	5.65d	3.05f	3.69e	4.62g	4.73g	8.08b
Limonene	3.42a	3.27f	3.47f	1.31e	3.08cf	1.97de	2.41cd	6.99b
Eucalyptol	7.28a	5.01bc	3.71d	5.12b	3.98cd	3.25d	3.74d	3.44d
1-Octen-3-ol. acetate	3.80a	2.70de	2.82de	4.23c	6.22b	2.10e	4.42c	3.68cd
Camphor	2.09a	2.32b	1.40d	1.89c	0.40f	1.12e	0.34f	0.39f
Borneol + Lavandulol	4.66a	7.63b	5.75d	6.07d	1.37e	4.78c	1.46e	1.35e
m-Cymen-8-ol	2.09a	3.18c	2.48d	3.67b	0.02e	2.74d	0.08e	0.07e
p-Cymen-8-ol	4.09a	6.31c	6.05c	7.17b	1.10d	6.07c	1.04d	0.89d
Cumaldehyde	1.92a	3.59c	3.74c	4.48b	0.59d	4.30b	0.66d	0.59d
Linalyl acetate	2.21a	3.46d	11.06b	4.23d	1.60e	5.29c	1.66e	1.75e
Bornyl acetate	5.57a	3.54c	2.36e	4.04b	0.07f	3.07d	0.07f	0.14f
Caryophyllene <(E)->	6.11a	2.11d	2.78c	3.51f	6.38b	4.85e	5.28e	3.98f
γ-Cadinene	10.53a	3.67f	4.43ef	4.74e	8.48cd	7.80d	9.20c	5.88b
Caryophyllene oxide	3.31a	2.43c	1.63b	2.12bc	2.24bc	2.11bc	2.47c	1.89bc
τ-Cadinol	2.04a	1.62d	1.44d	2.78c	2.74c	3.37bc	3.85b	1.74d
Ʃ	66.51a	59.83b	61.42b	60.17b	43.97c	59.59b	43.68c	42.47c
Linalool	0.38a	4.32c	6.33b	4.71c	0.76ad	6.62b	0.73ad	1.16d
TOTAL essential oil [mL 100g-1 dw]2	3.082a	0.588e	0.726f	0.992cd	0.921bc	1.075d	0.881b	1.302g
