# Supplementary figures and images for: HS-SPME Analysis of True Lavender (Lavandula angustifolia Mill.) Leaves Treated by Various Drying Methods
Source: MDPI journal article supplement (doi:10.3390/molecules24040764), 2019-02-20

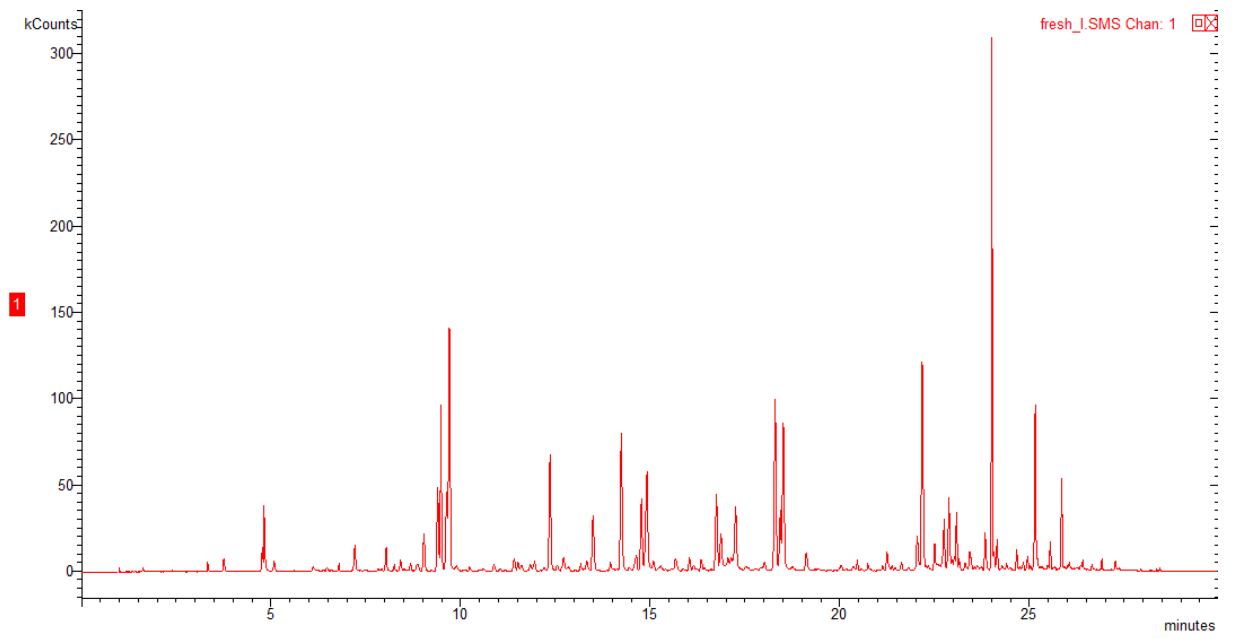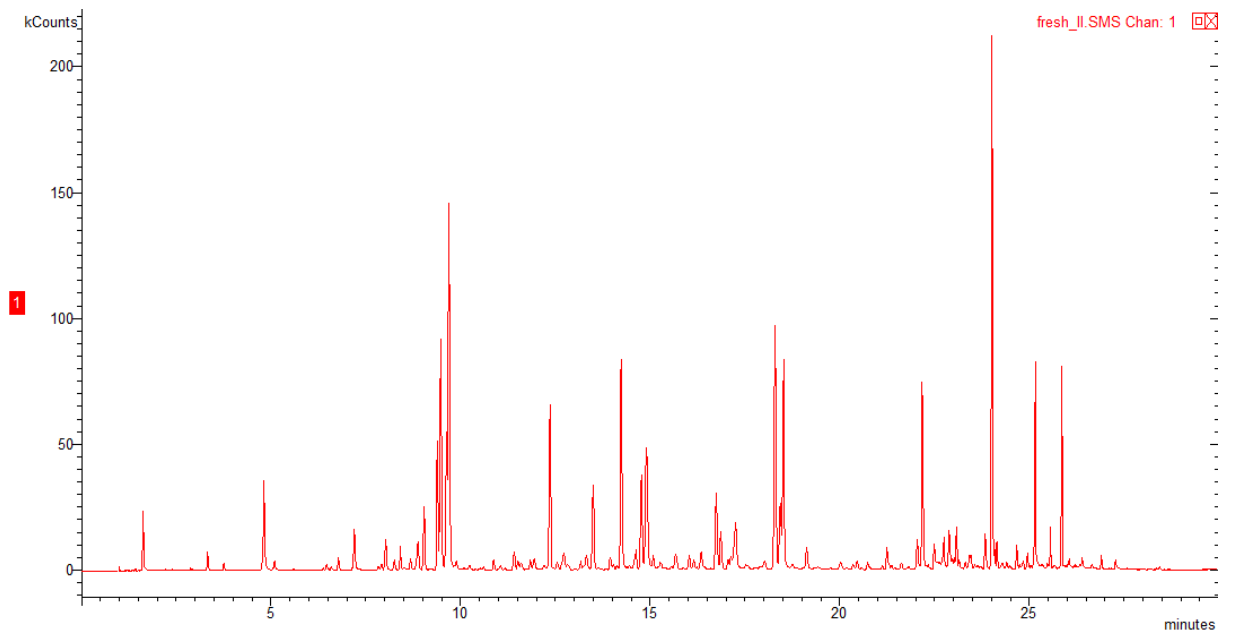

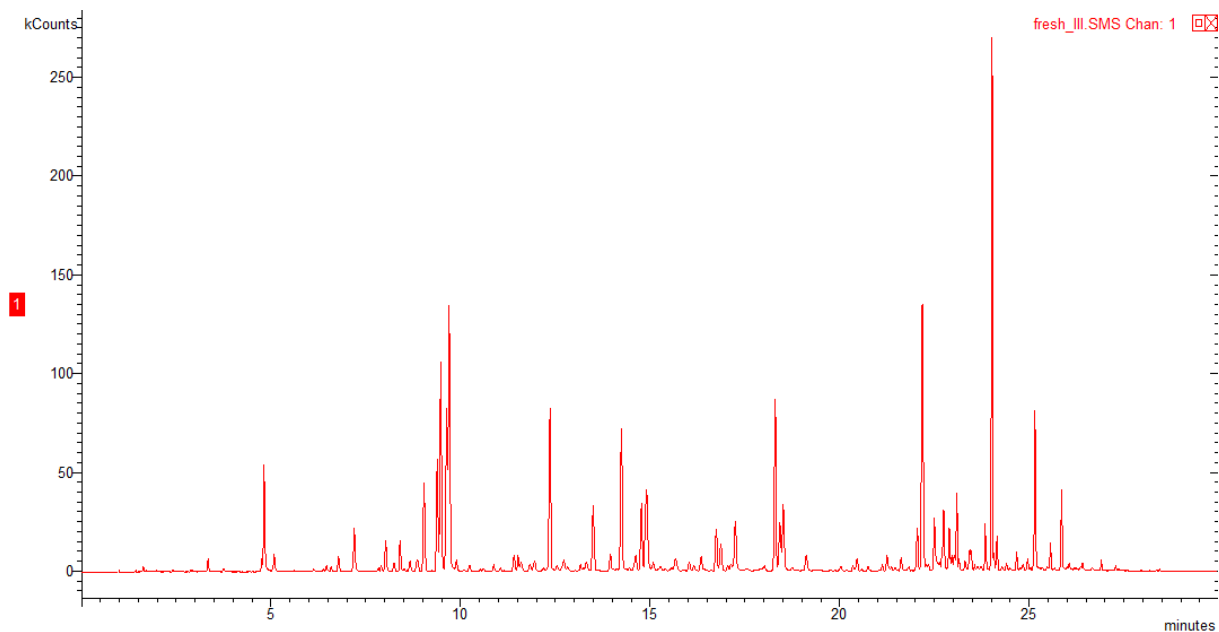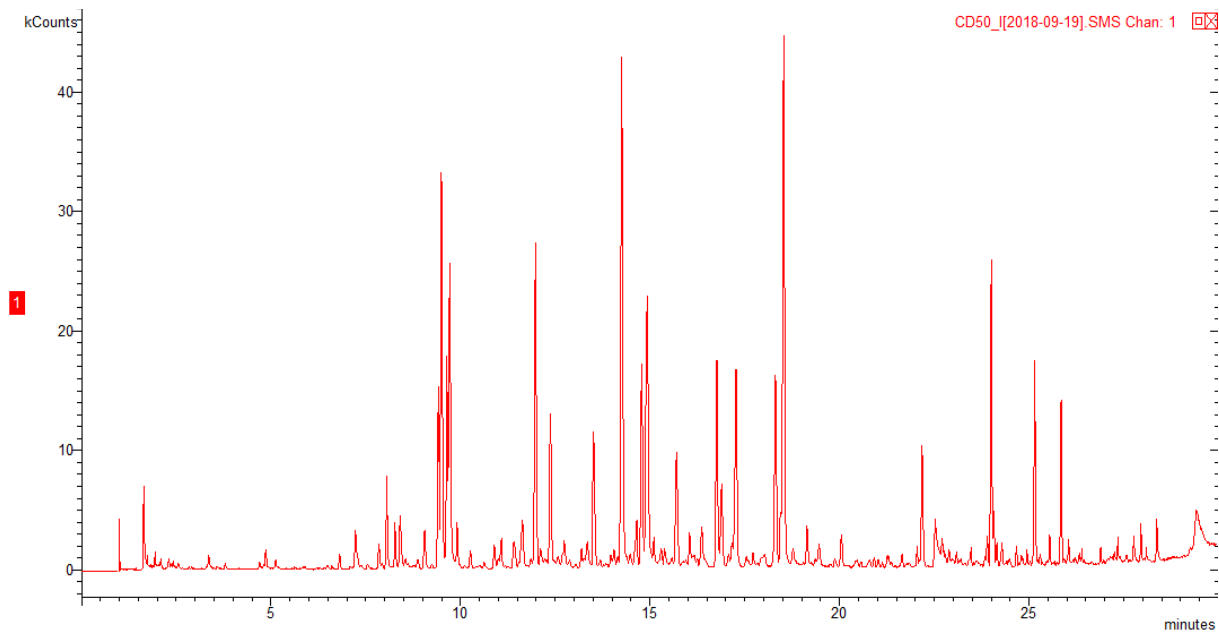

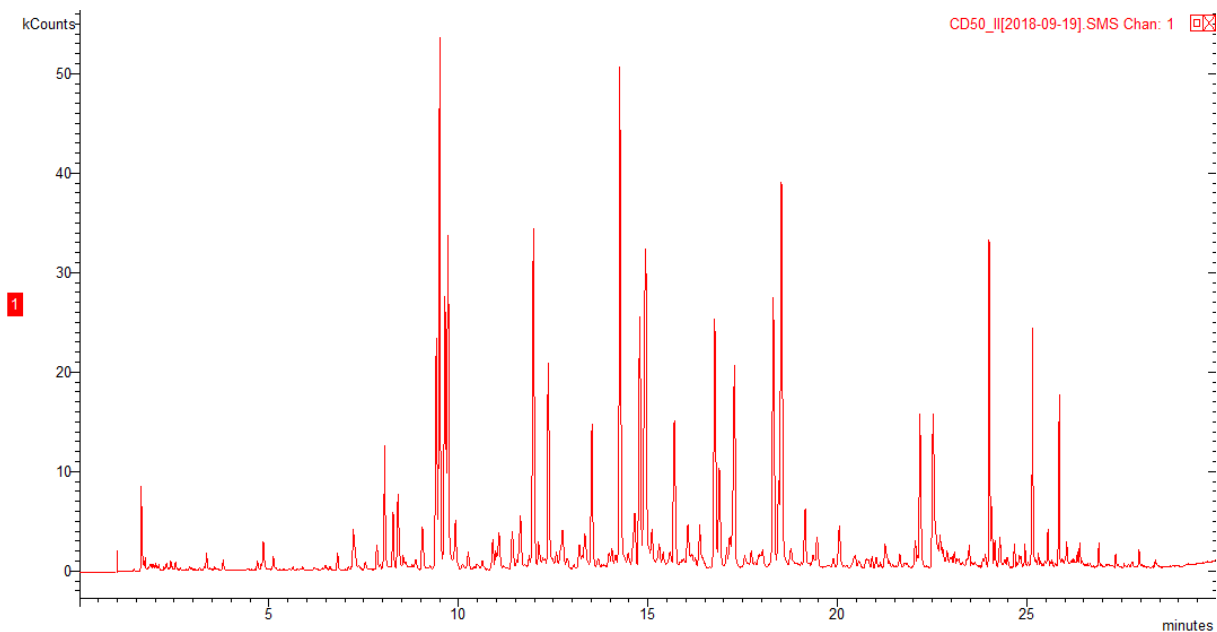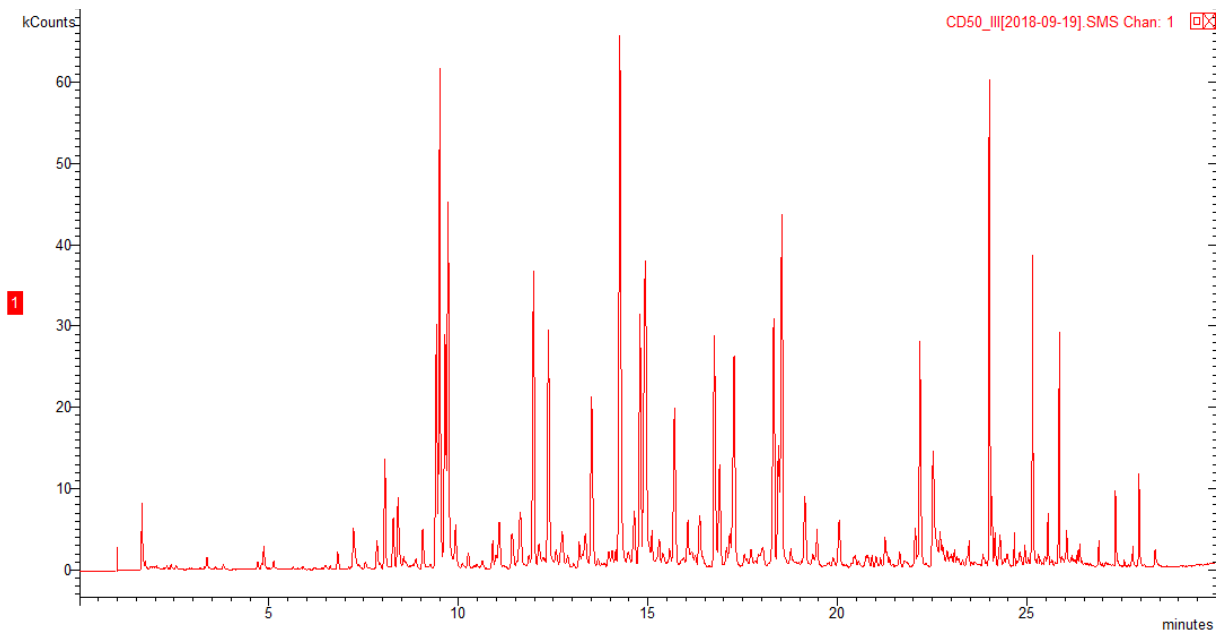

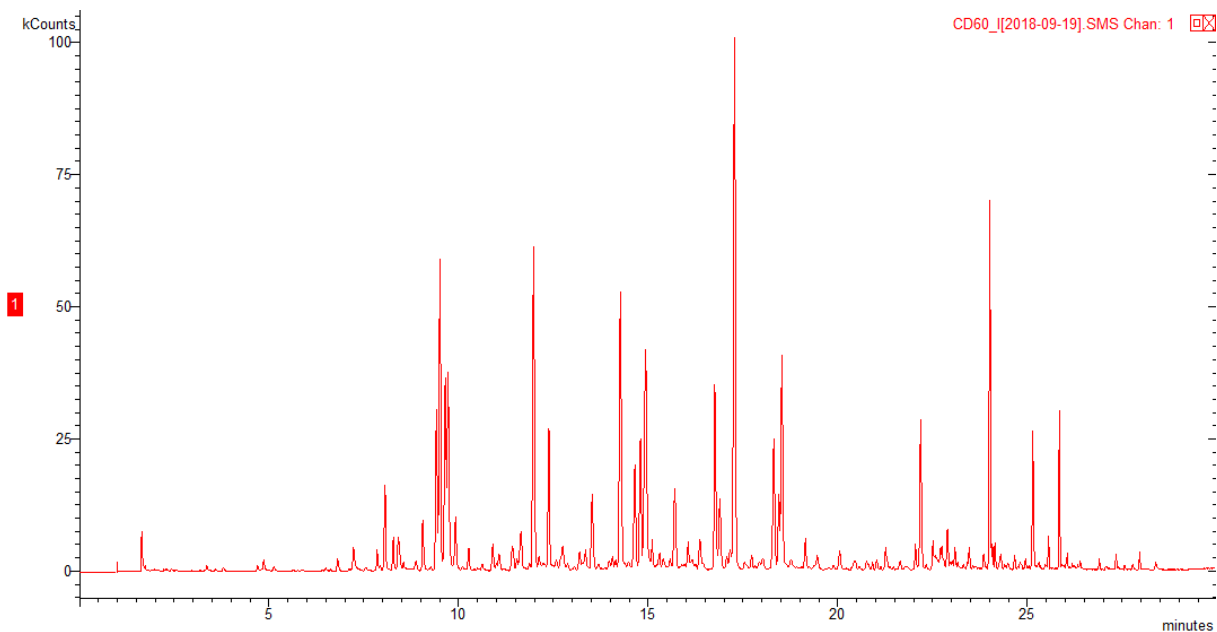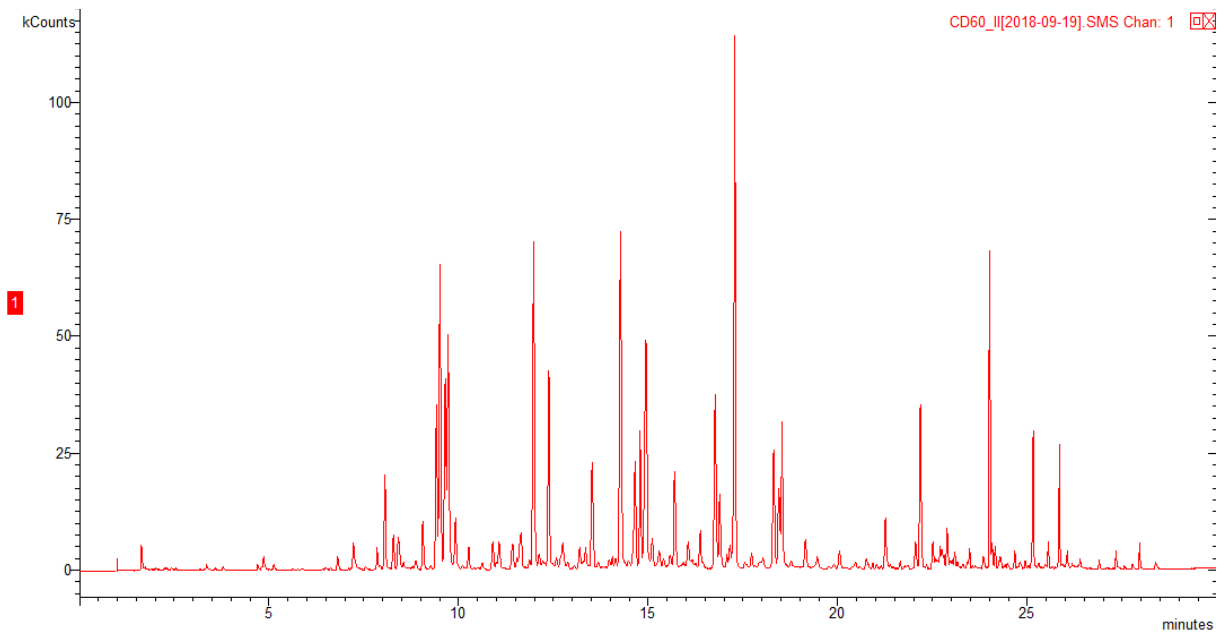

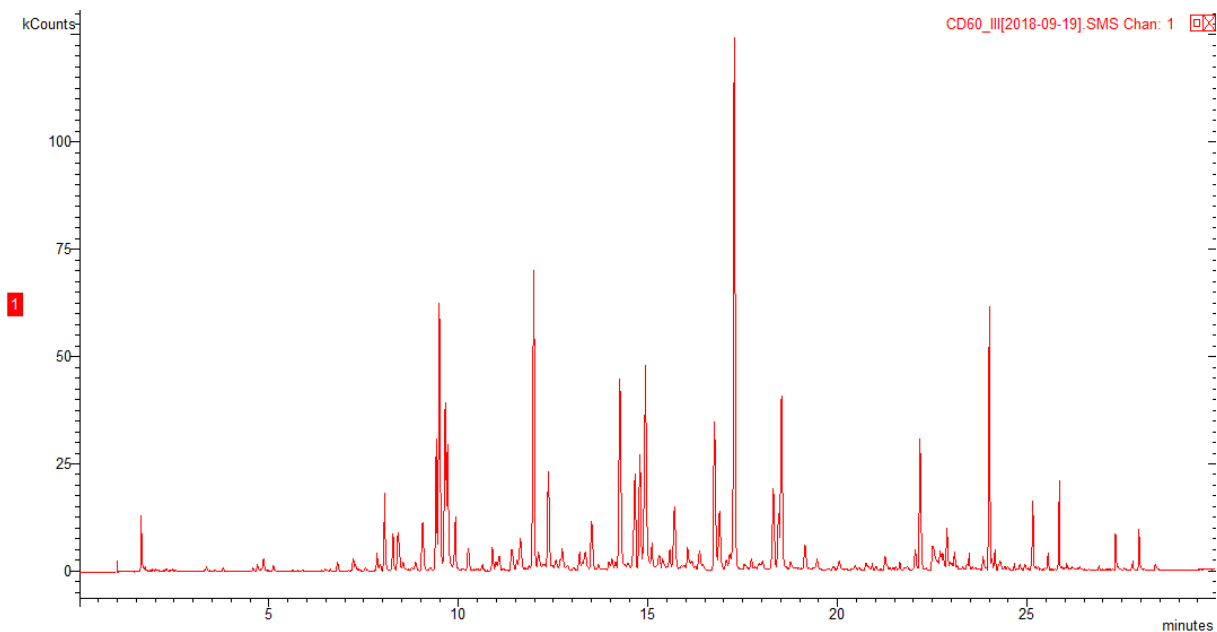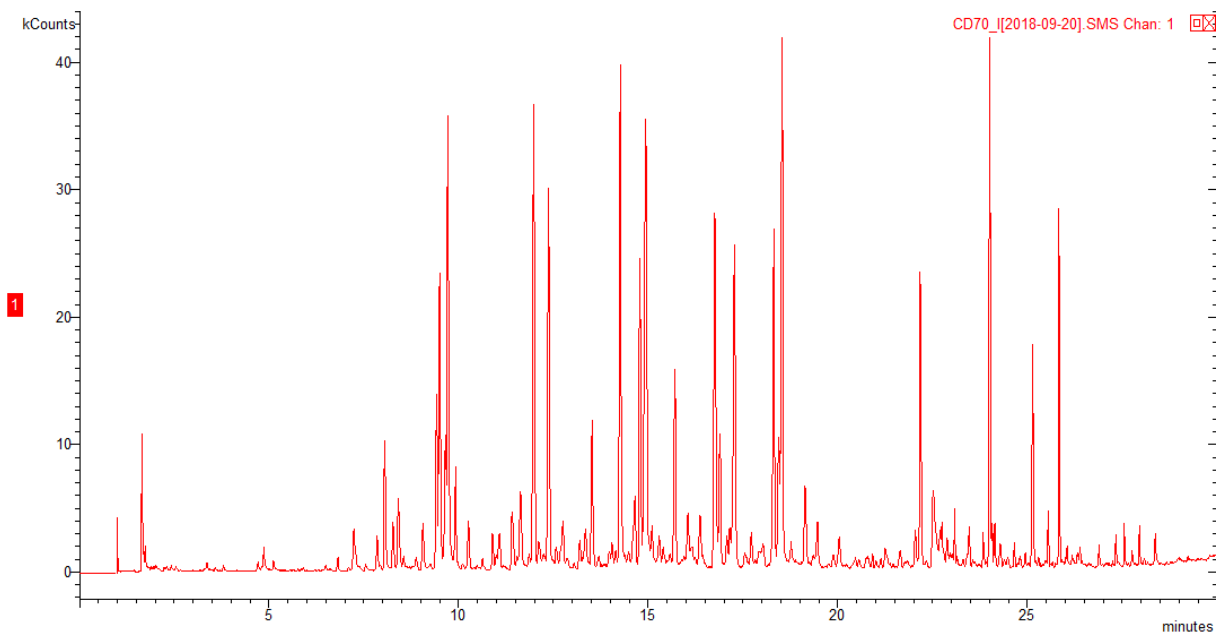

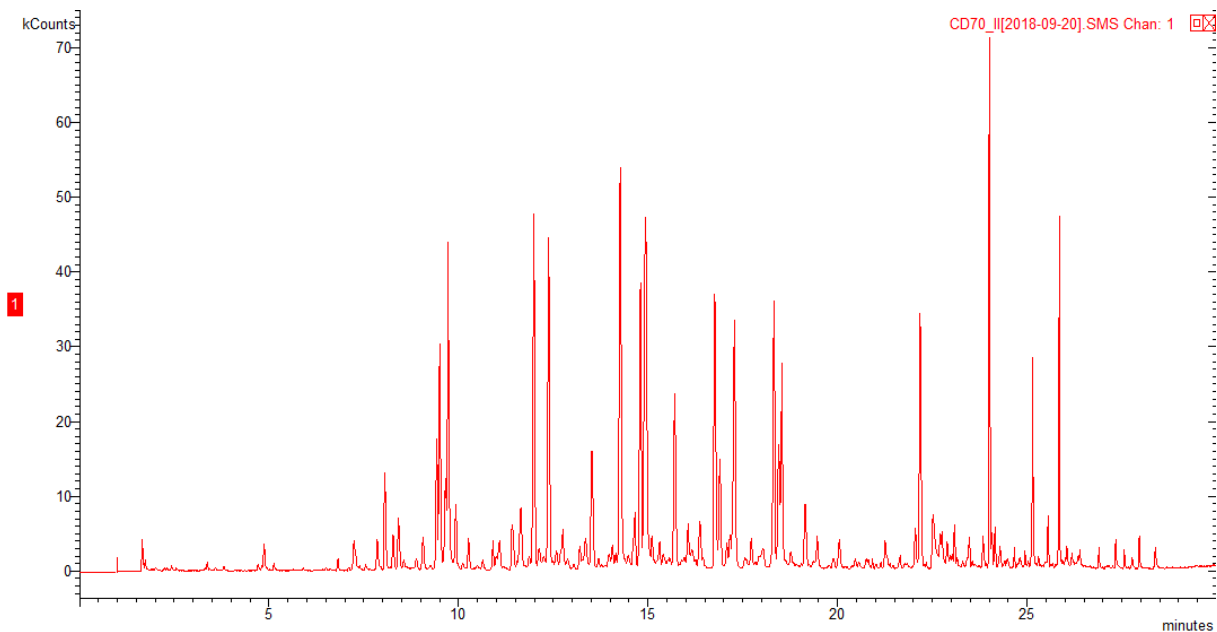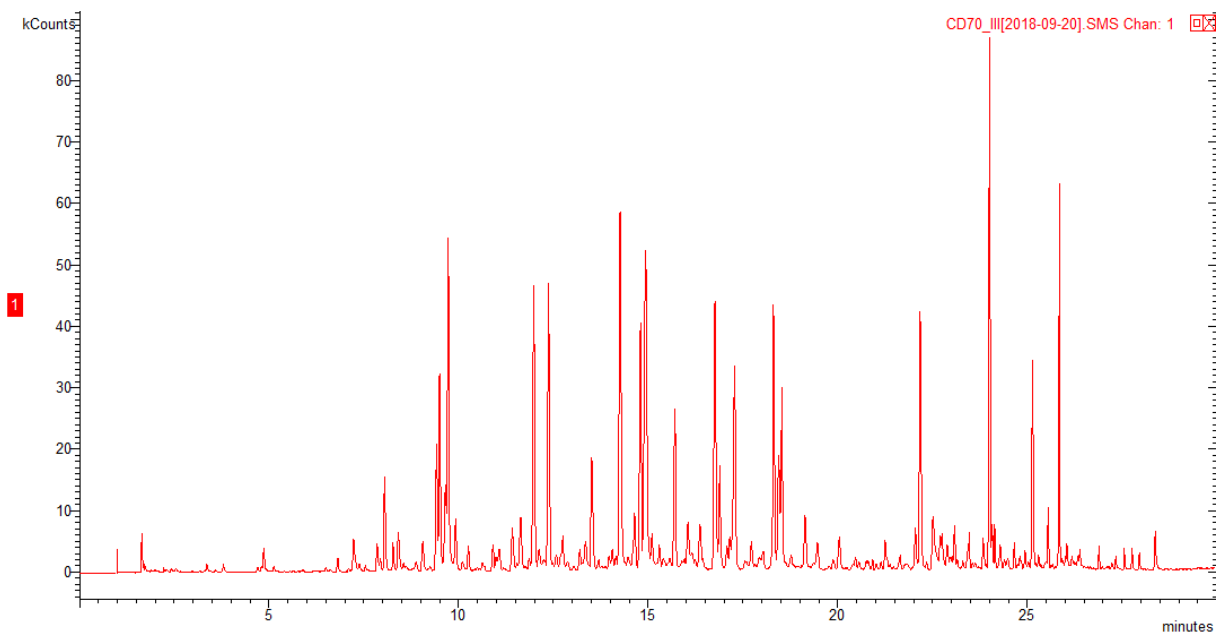

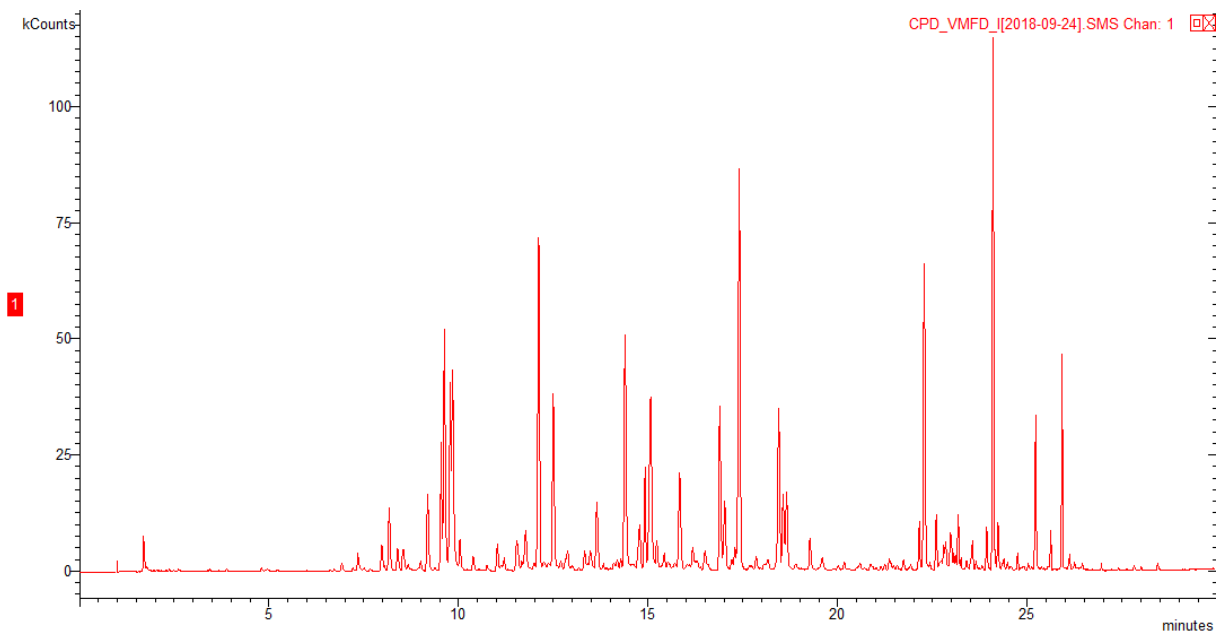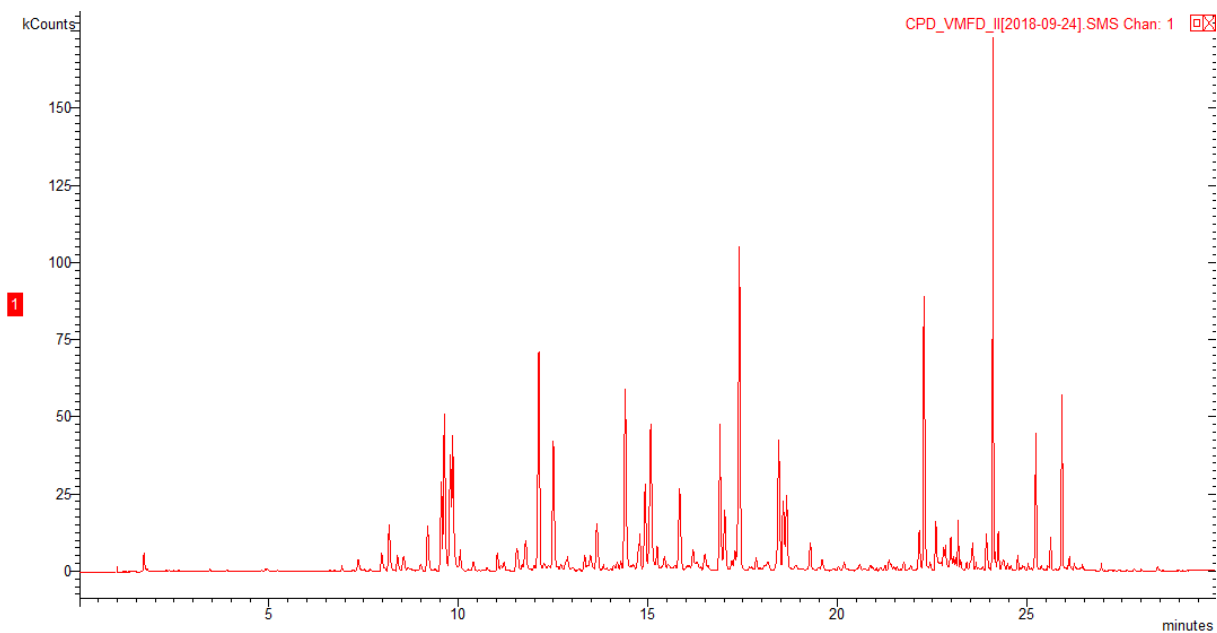

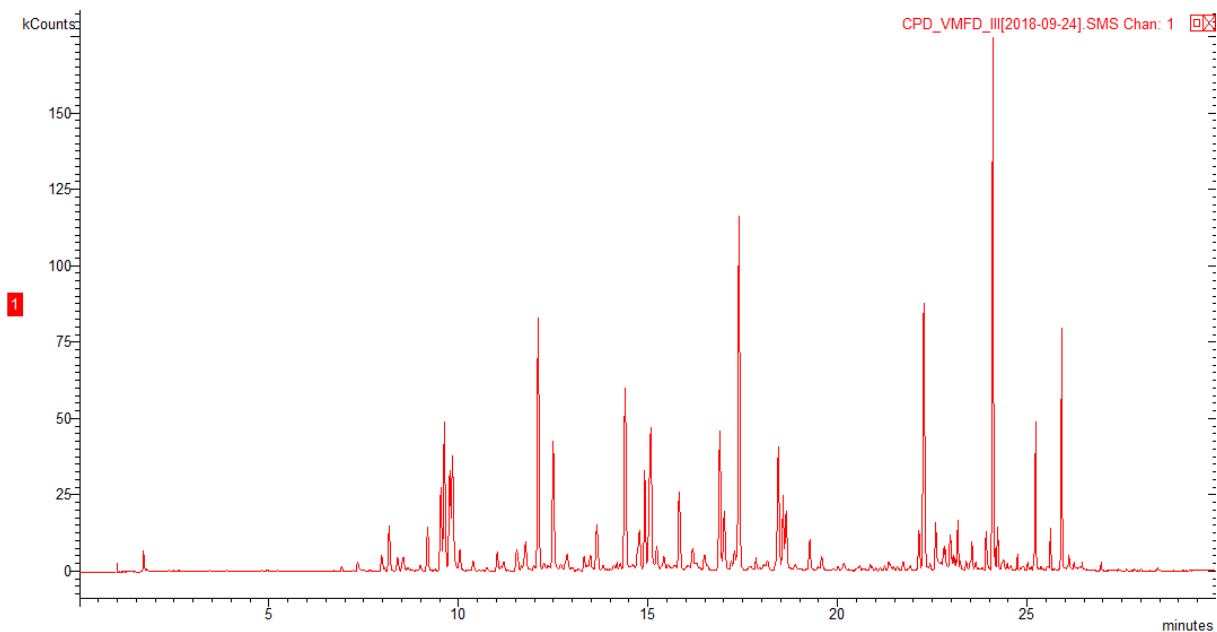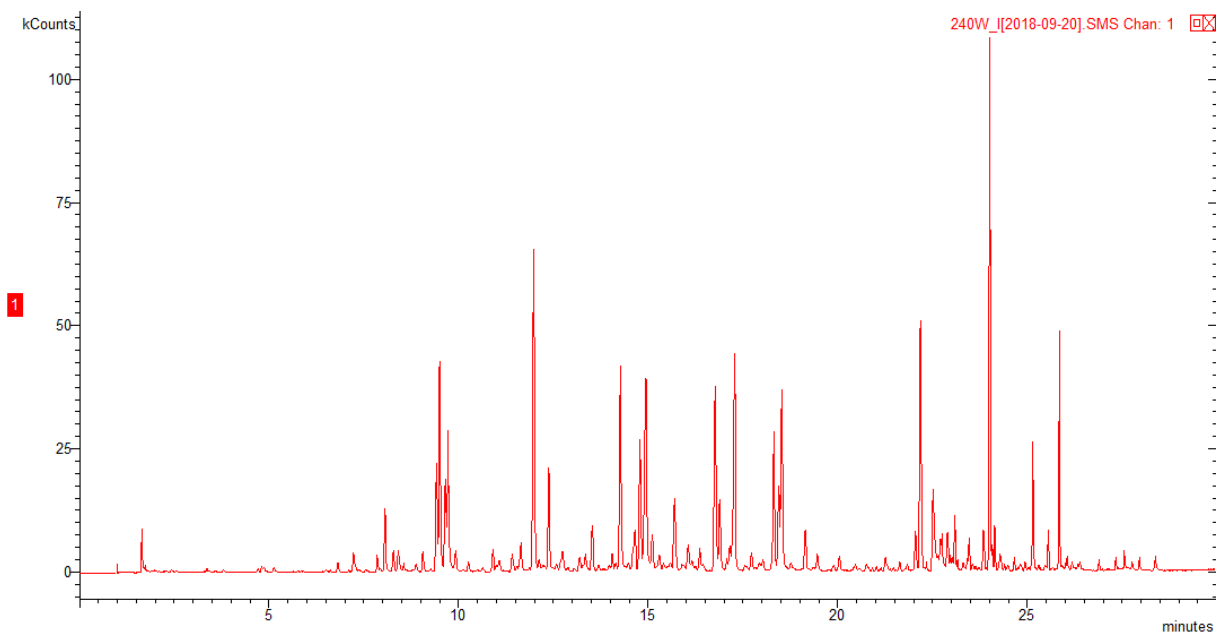



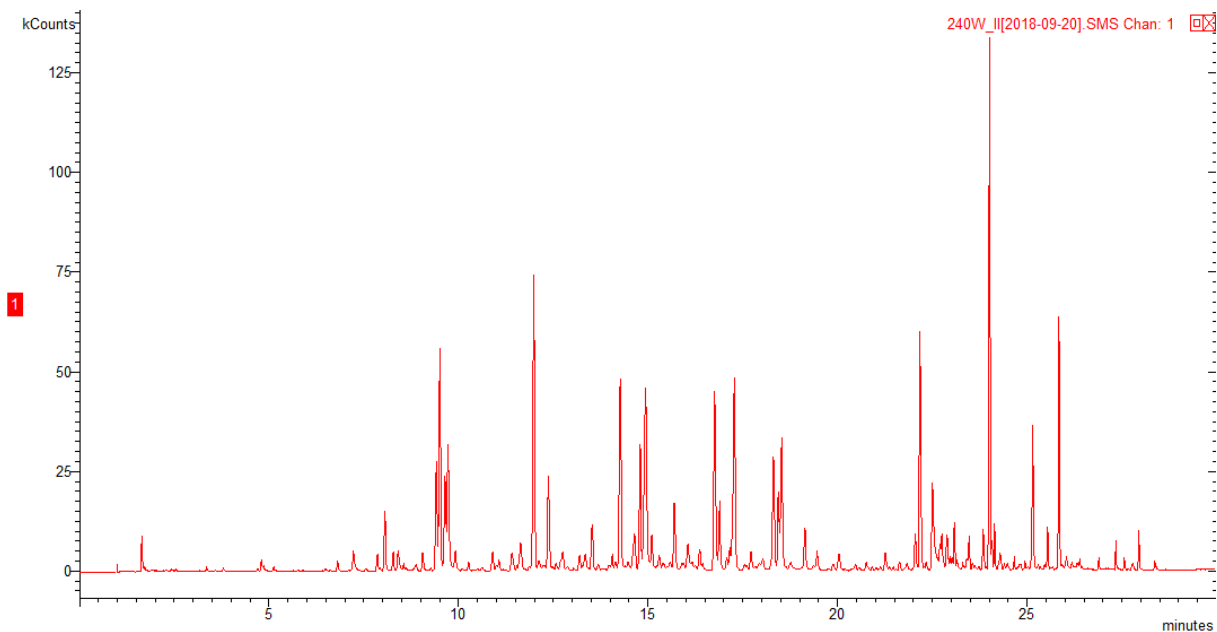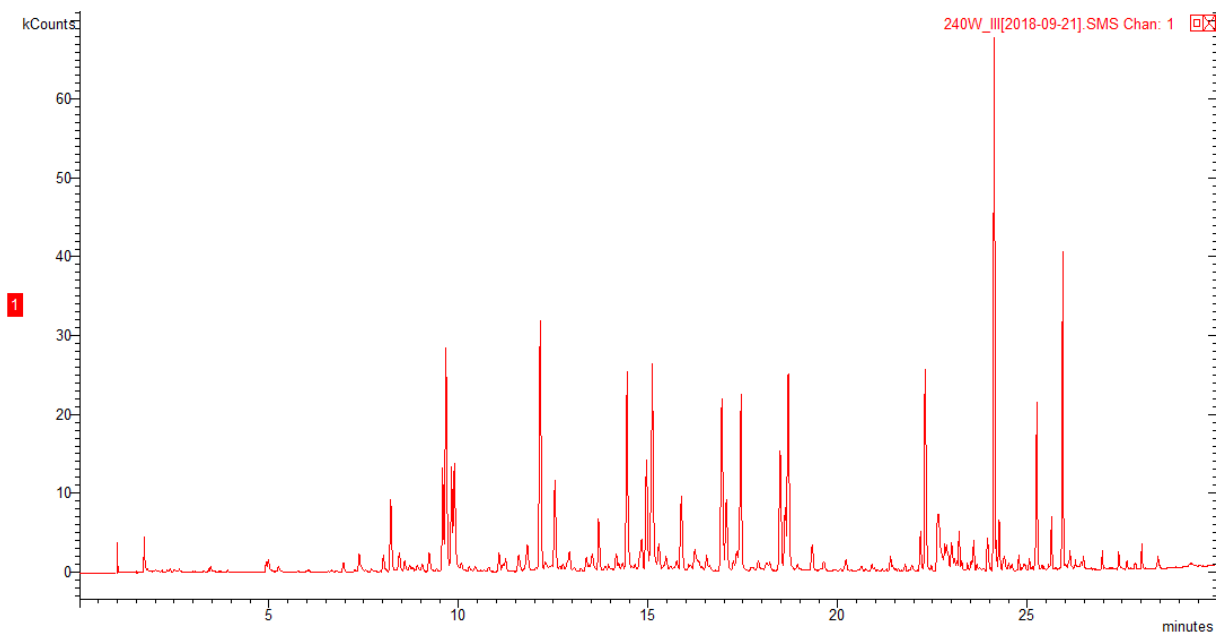

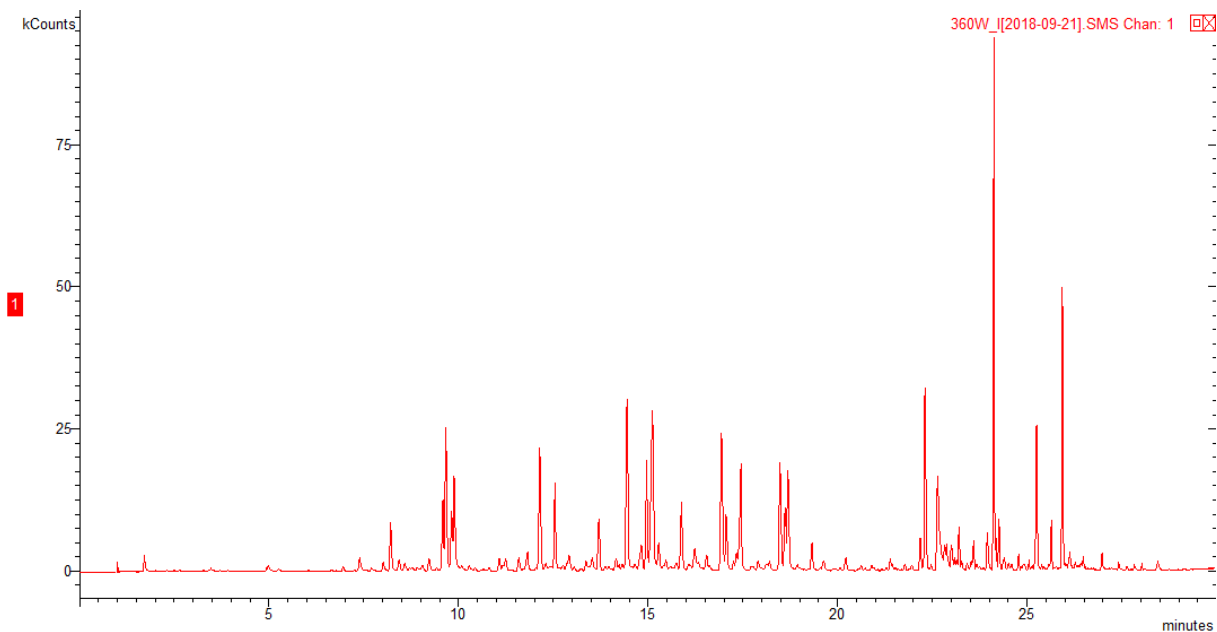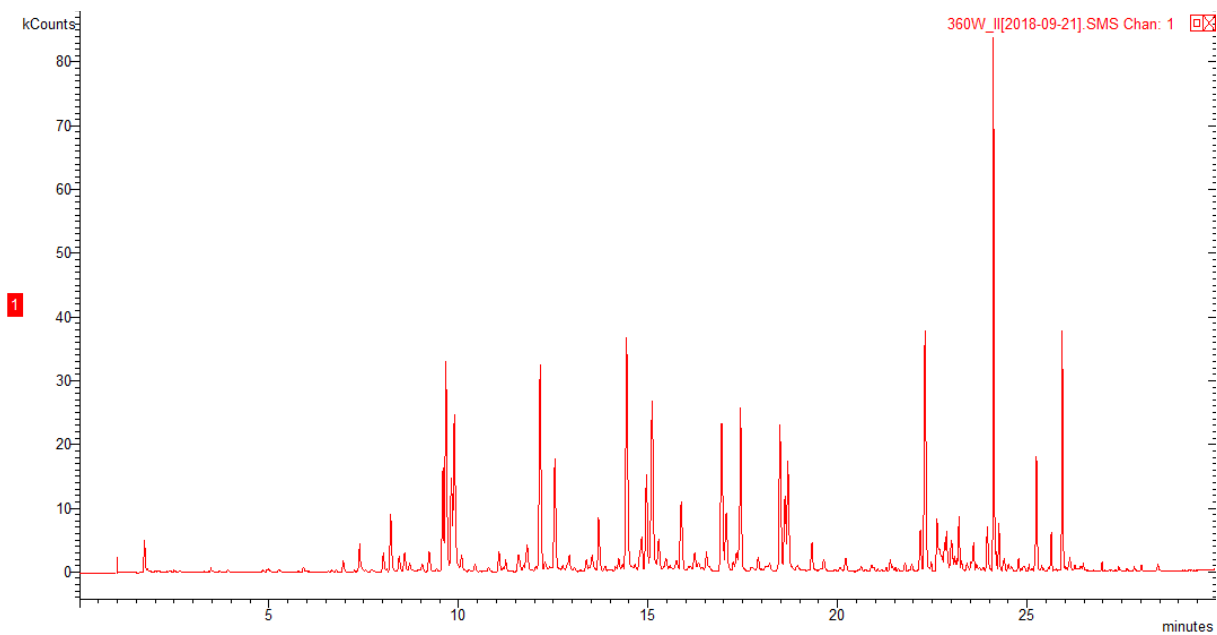

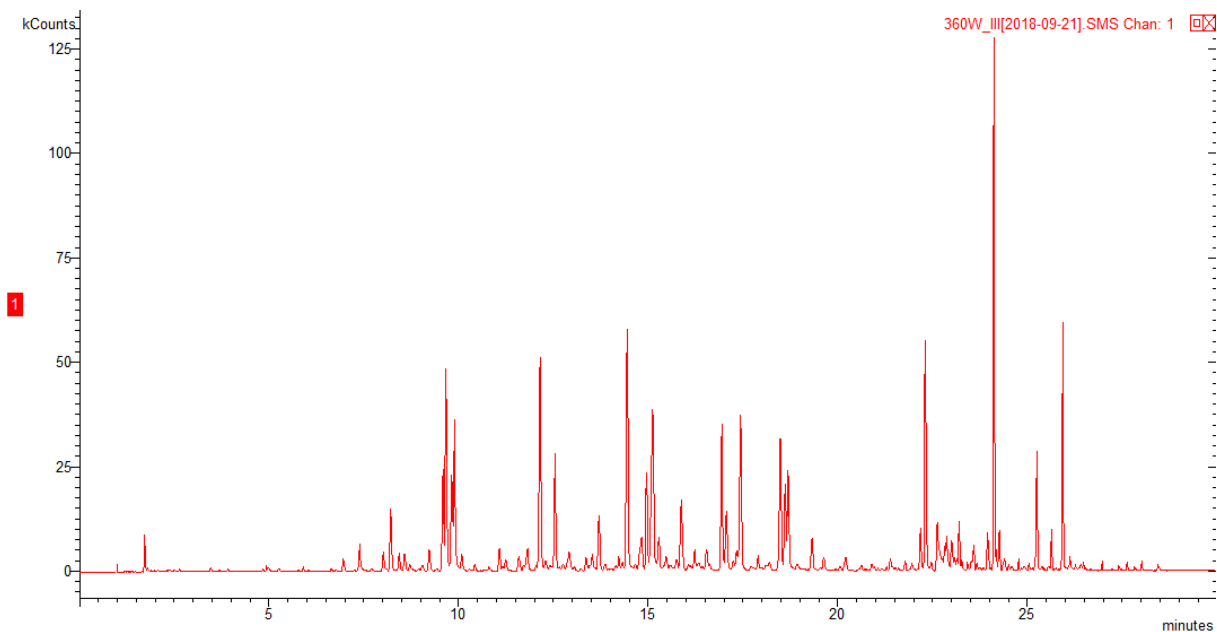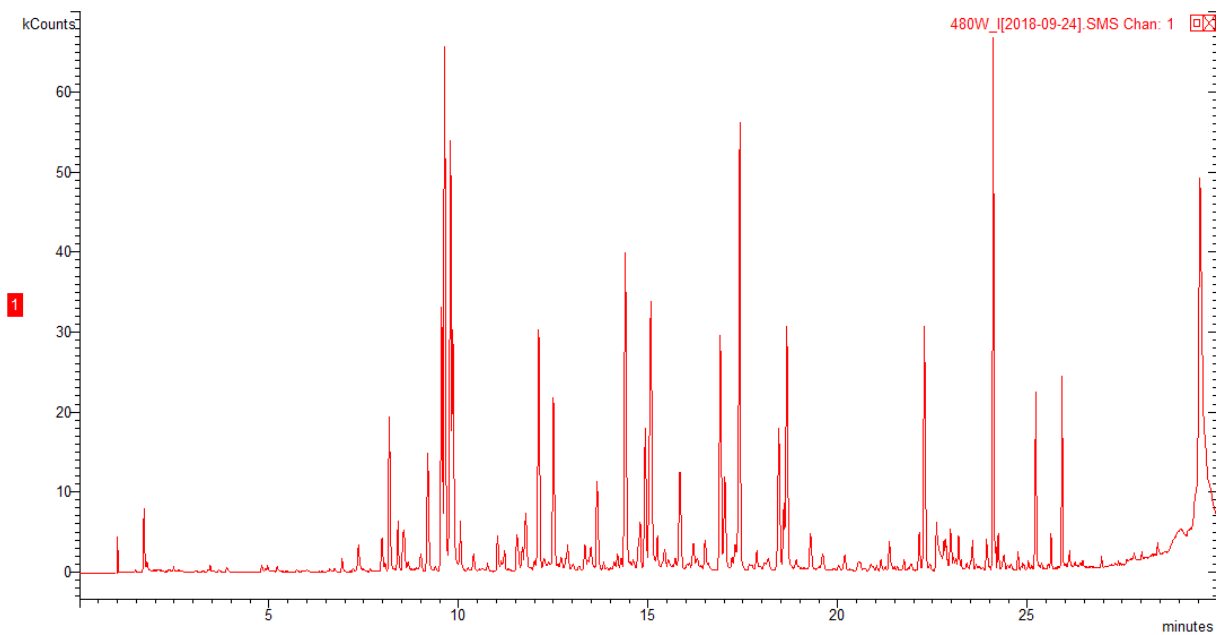

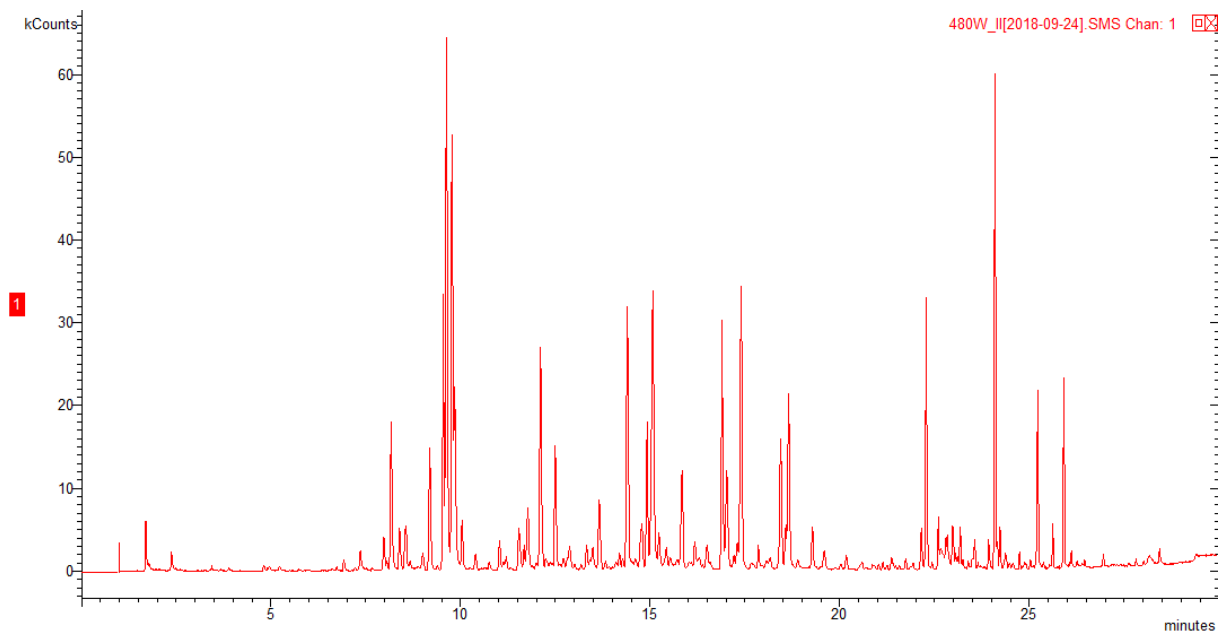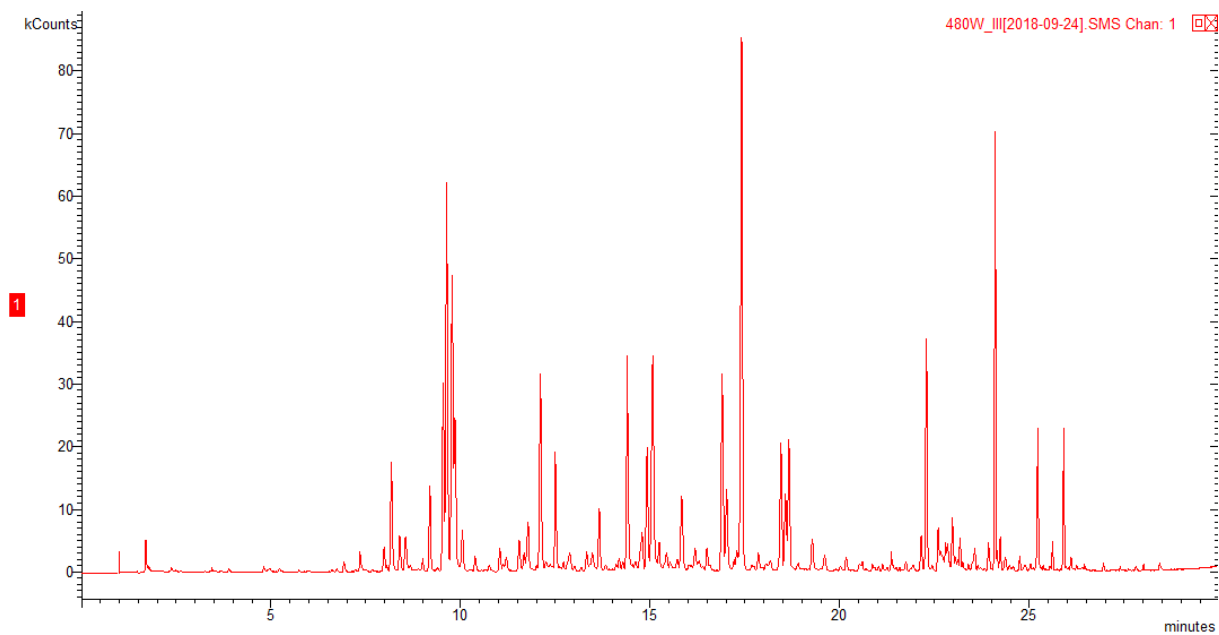

Supplement: s1 [file s1]

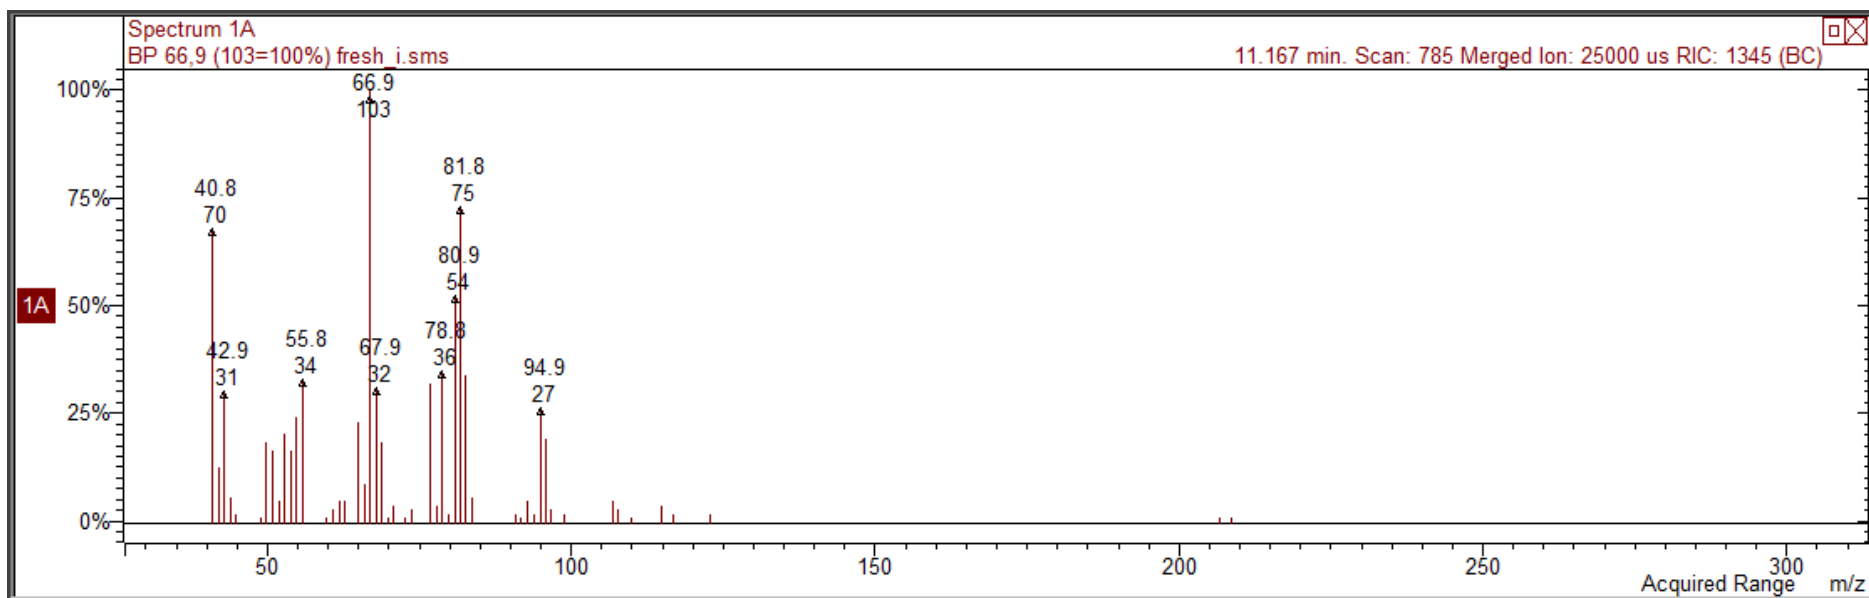

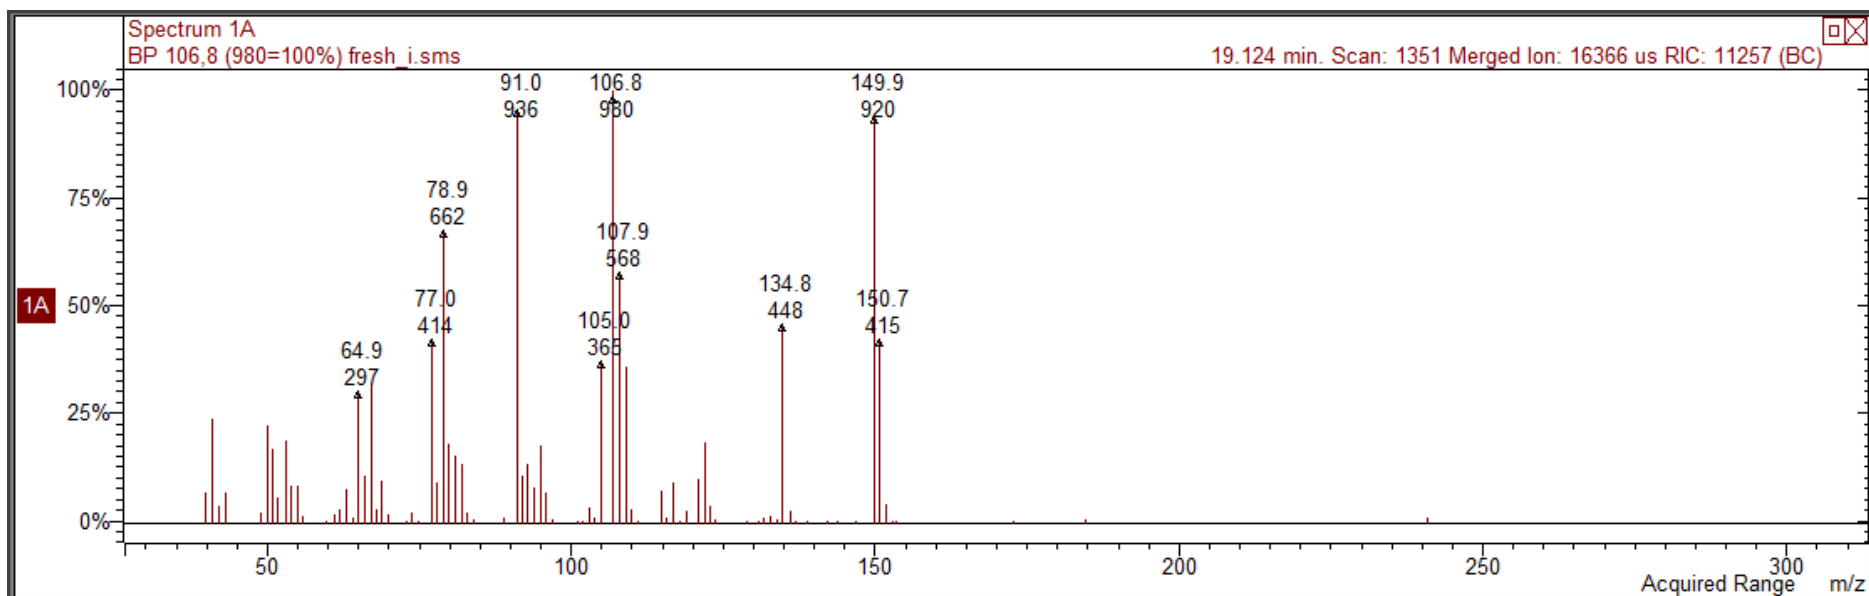

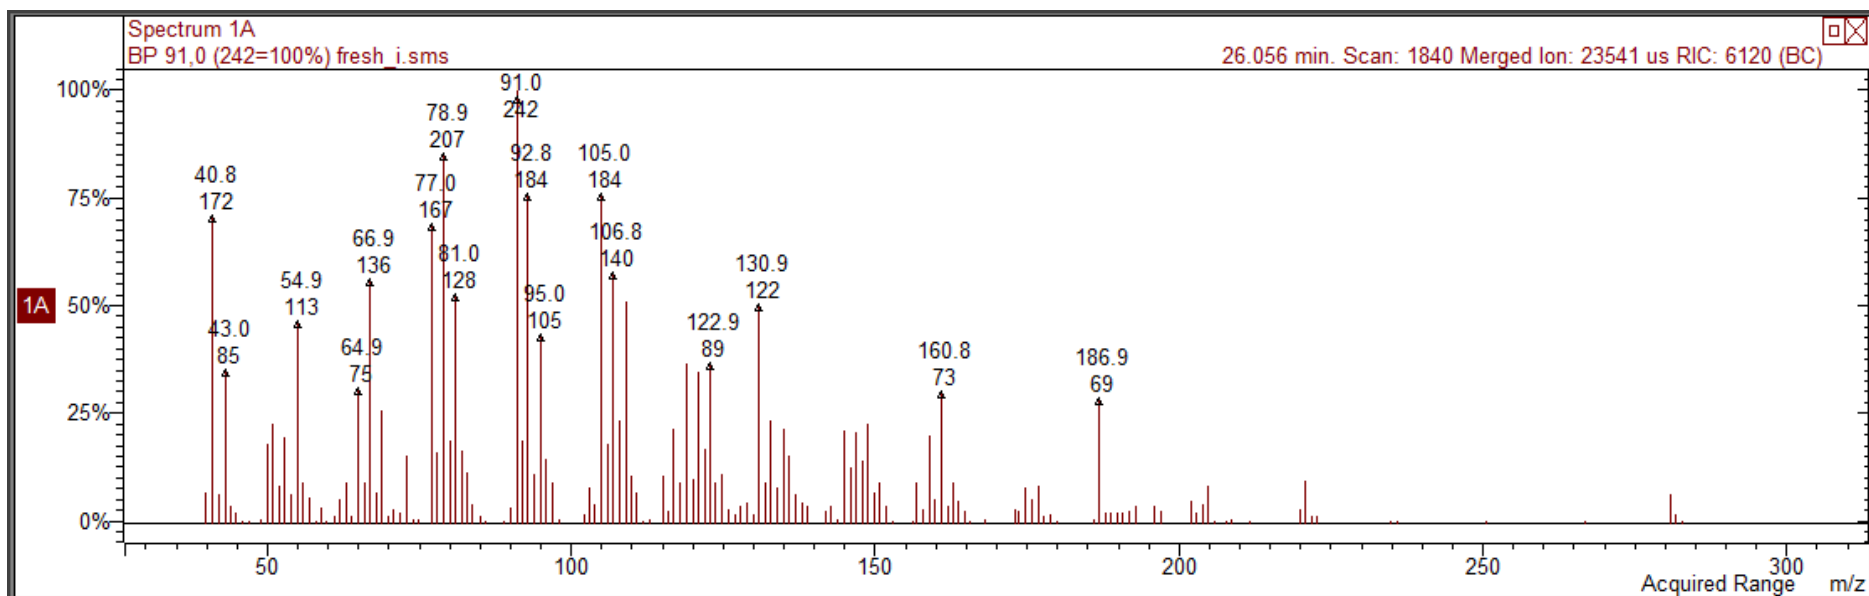

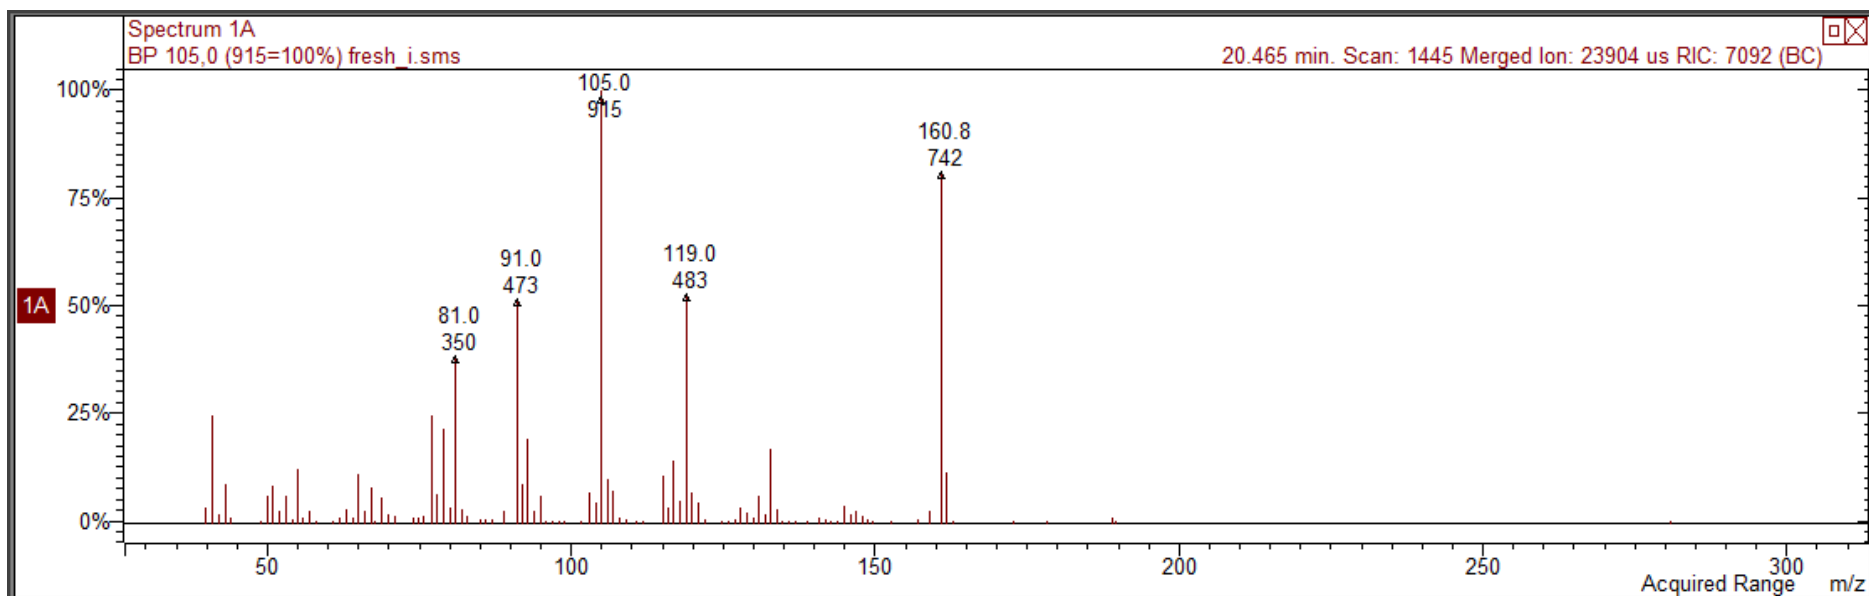

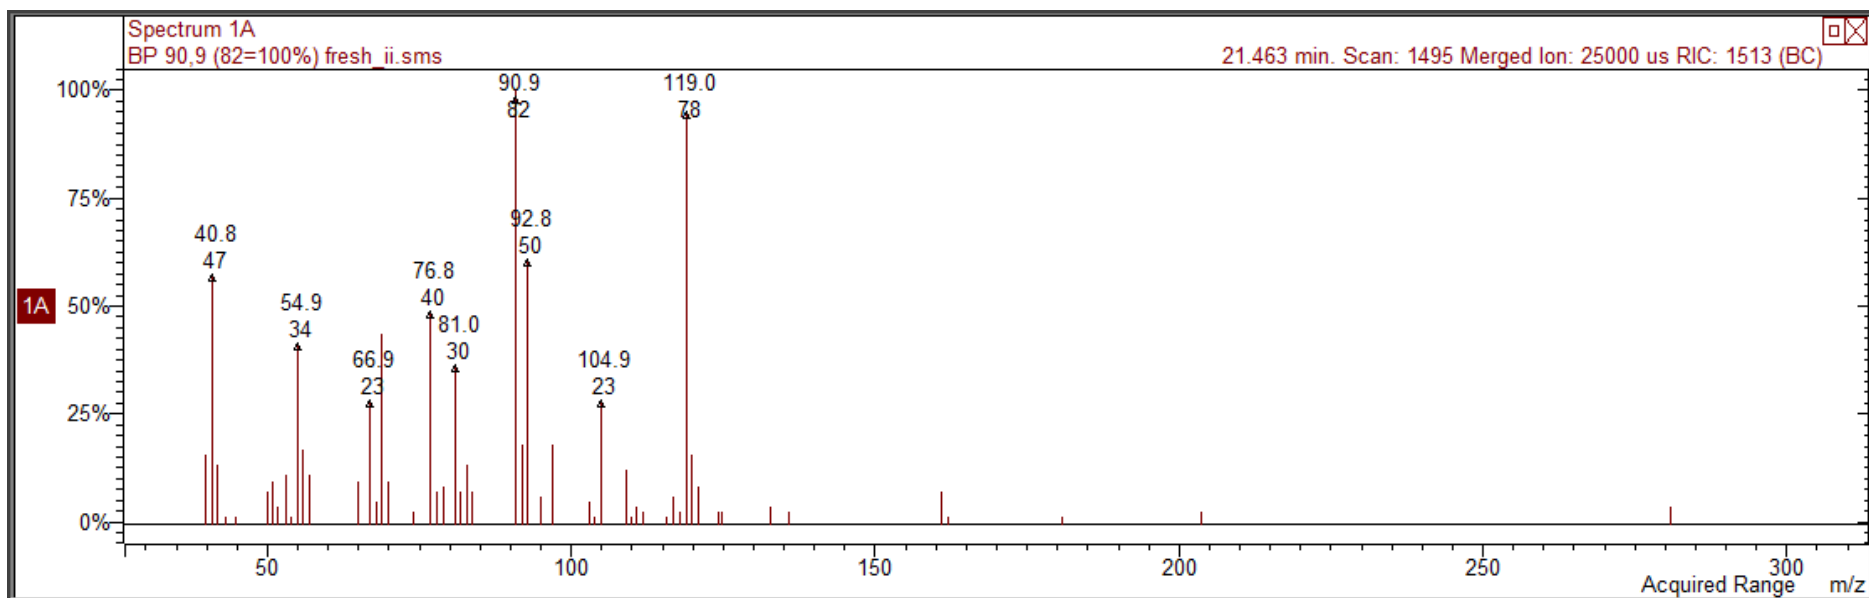

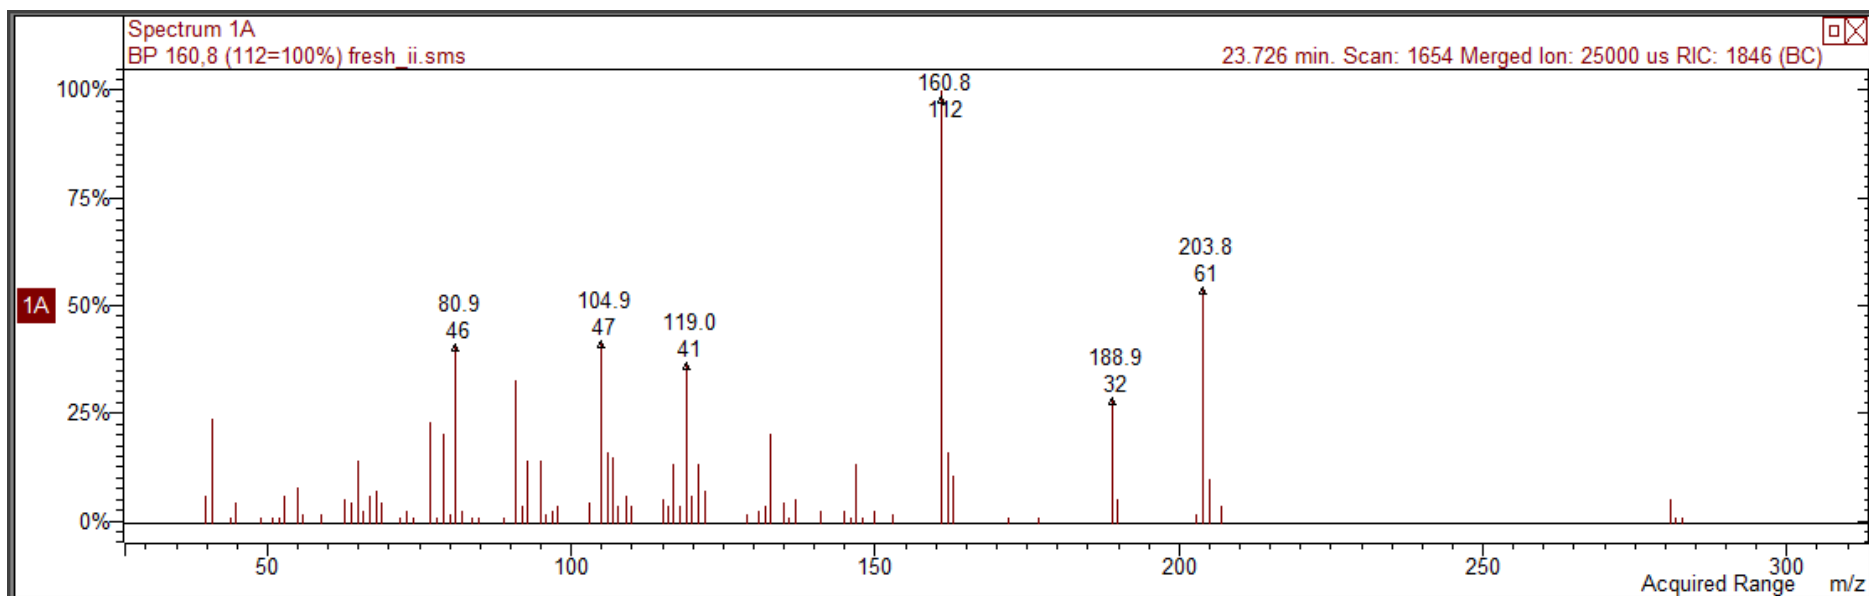

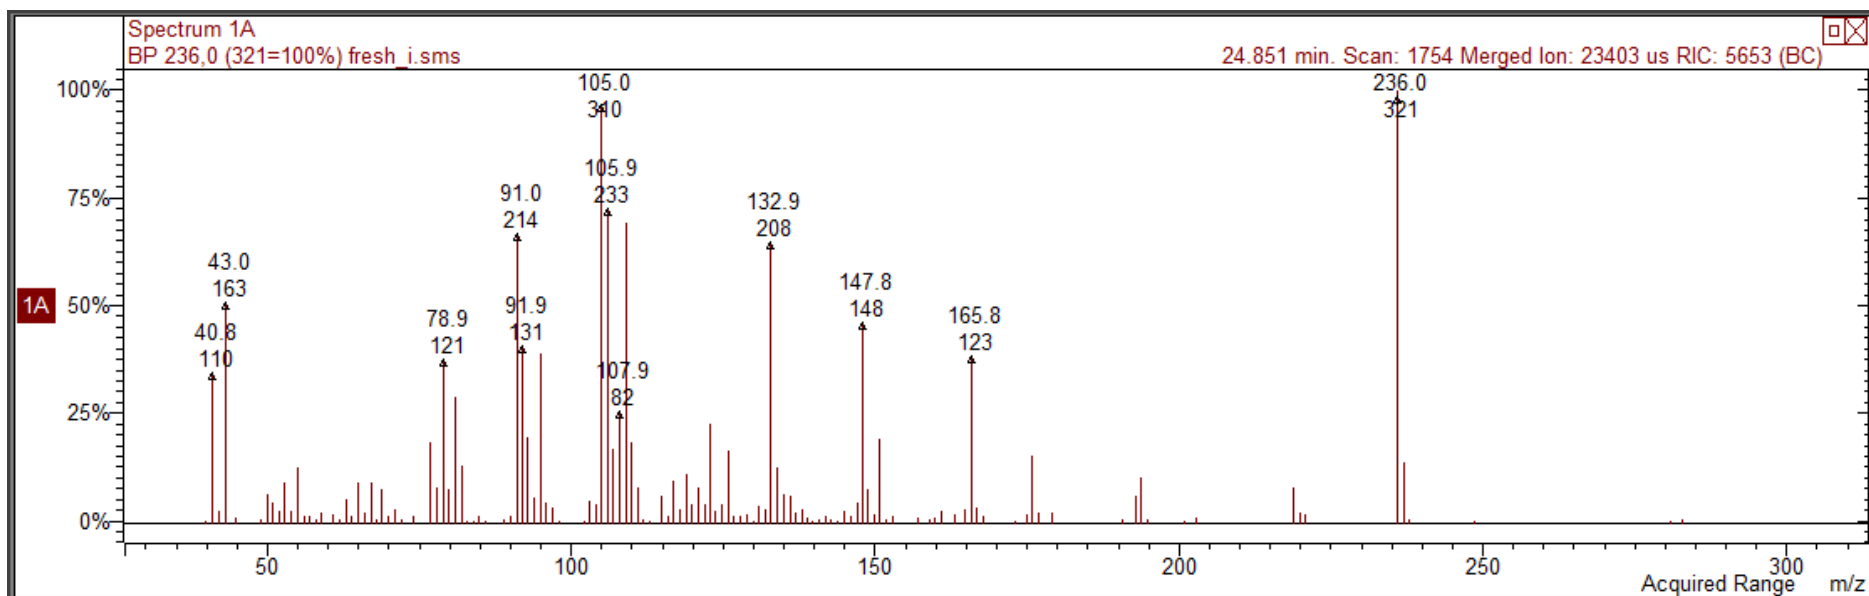

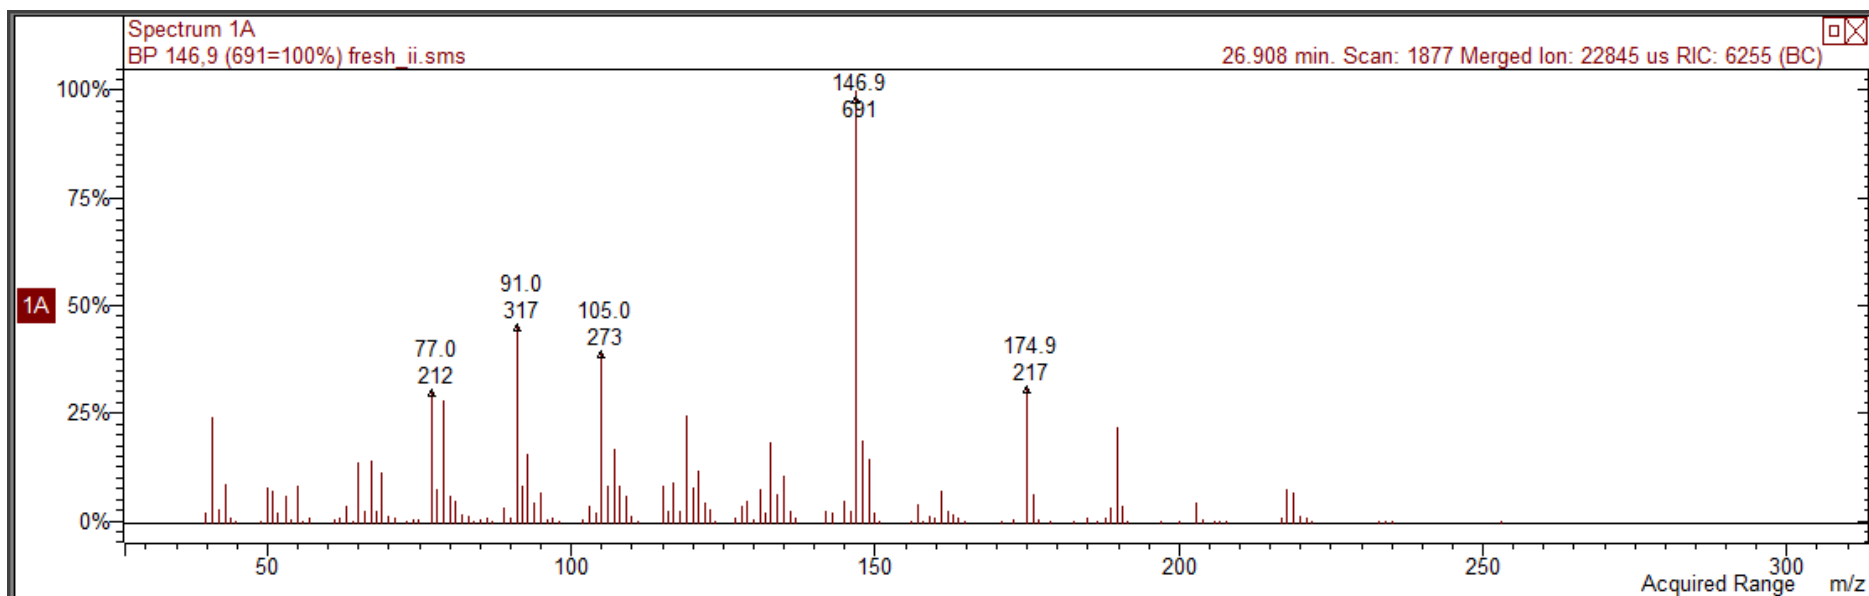

Supplement: s1 [file s1]
